# Supplementary material for: Calpain activation mediates microgravity-induced myocardial abnormalities in mice via p38 and ERK1/2 MAPK pathways
Source: PubMed Central journal article supplement (PMC7864076; doi:10.1074/jbc.ra119.011890), 2021-01-13
Supplement: mmc1.pdf [file mmc1.pdf]

## Supplementary Figure 1

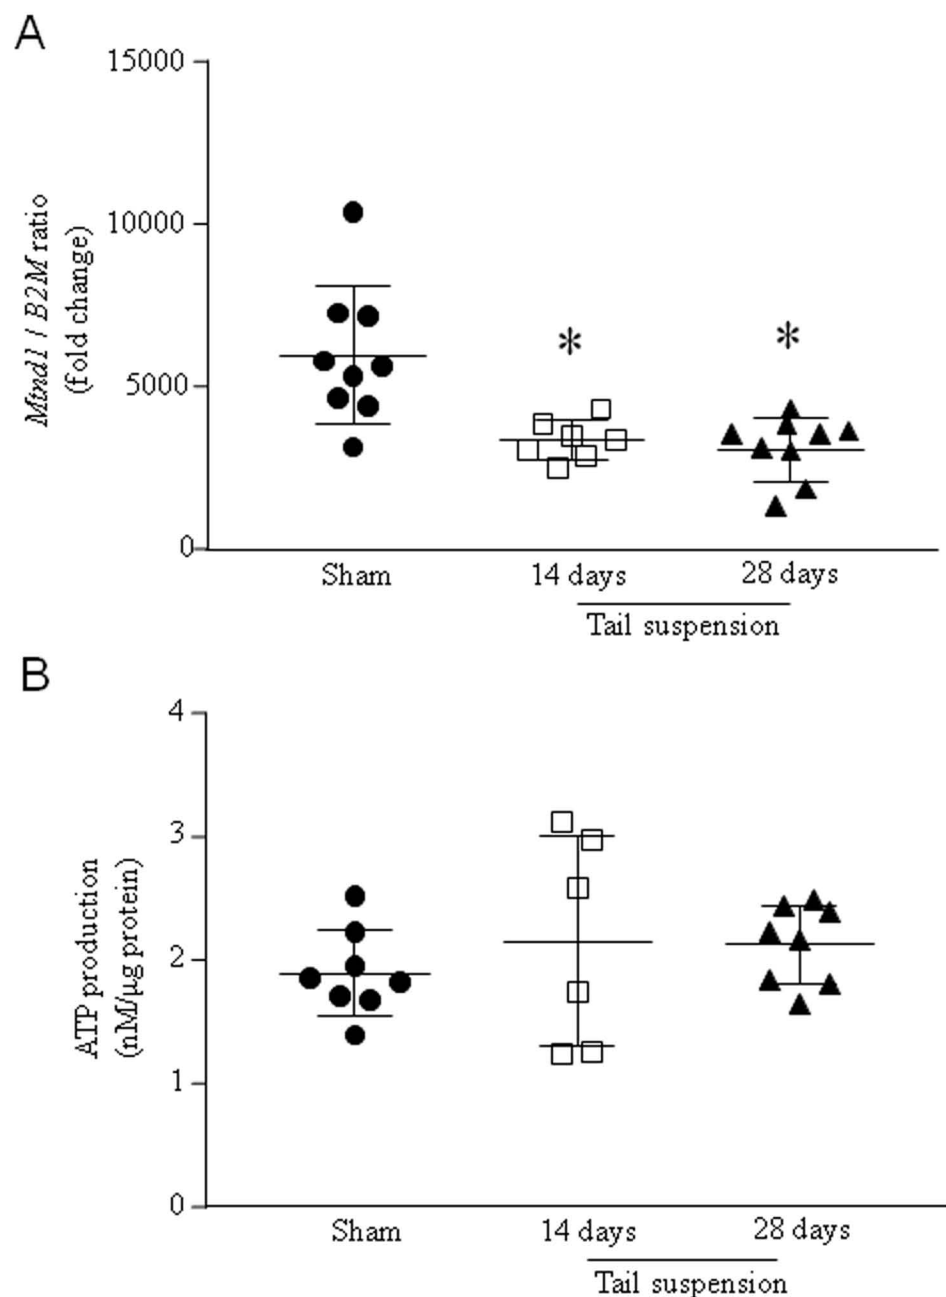

**Supplementary Figure 1. Effect of tail-suspension on mitochondrial DNA copies and ATP production in heart tissues.** Adult male mice were subjected to tail-suspension for 14 or 28 days. (A) Real-time PCR was conducted to determine the mRNA levels of mitochondrial NADH dehydrogenase subunit 1 (*Mtnd1*) and  $\beta$ 2 microglobulin (*B2M*) as a nuclear gene reference. (B) ATP production was measured in heart tissues. Data are mean  $\pm$  SD, n = 7 - 9. One-way ANOVA followed by Newman-Keuls test was performed for statistical analysis (F = 10.36,  $P = 0.0007$ ). \* $P < 0.05$  vs. Sham.

## Supplementary Figure 2

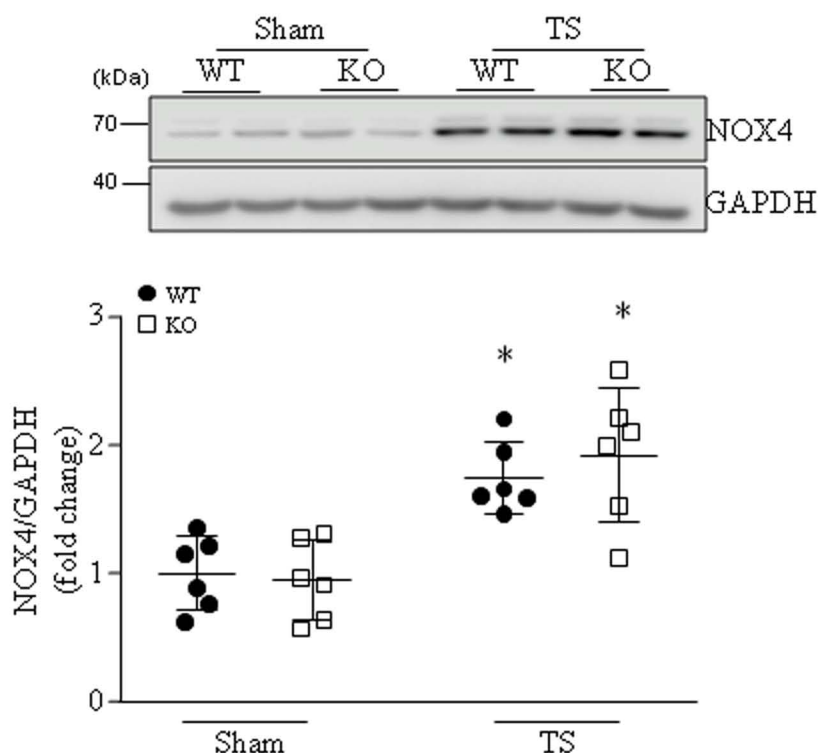

**Supplementary Figure 2. Tail-suspension equally results in higher protein levels of NOX4 in wild-type and *Capns1*-knockout mice.** Mice with cardiomyocyte-specific deletion of *Capns1* (KO) and their wild-type littermates (WT) were subjected to tail-suspension (TS) for 28 days. Upper panel: a representative western blot from 2 out of 6 different heart tissues for NOX4 and GAPDH. Lower panel: quantitation for NOX4 relative to GAPDH. Data are mean  $\pm$  SD,  $n = 6$  in each group. Two-way ANOVA followed by Newman-Keuls test was performed for statistical analysis. Interaction:  $F = 0.6369$ ,  $P = 0.4342$ ; Row Factor:  $F = 33.65$ ,  $P < 0.0001$ ; Column Factor:  $F = 0.1658$ ,  $P = 0.6882$ . \* $P < 0.05$  vs. Sham + WT or Sham + KO.

### Supplementary Figure 3

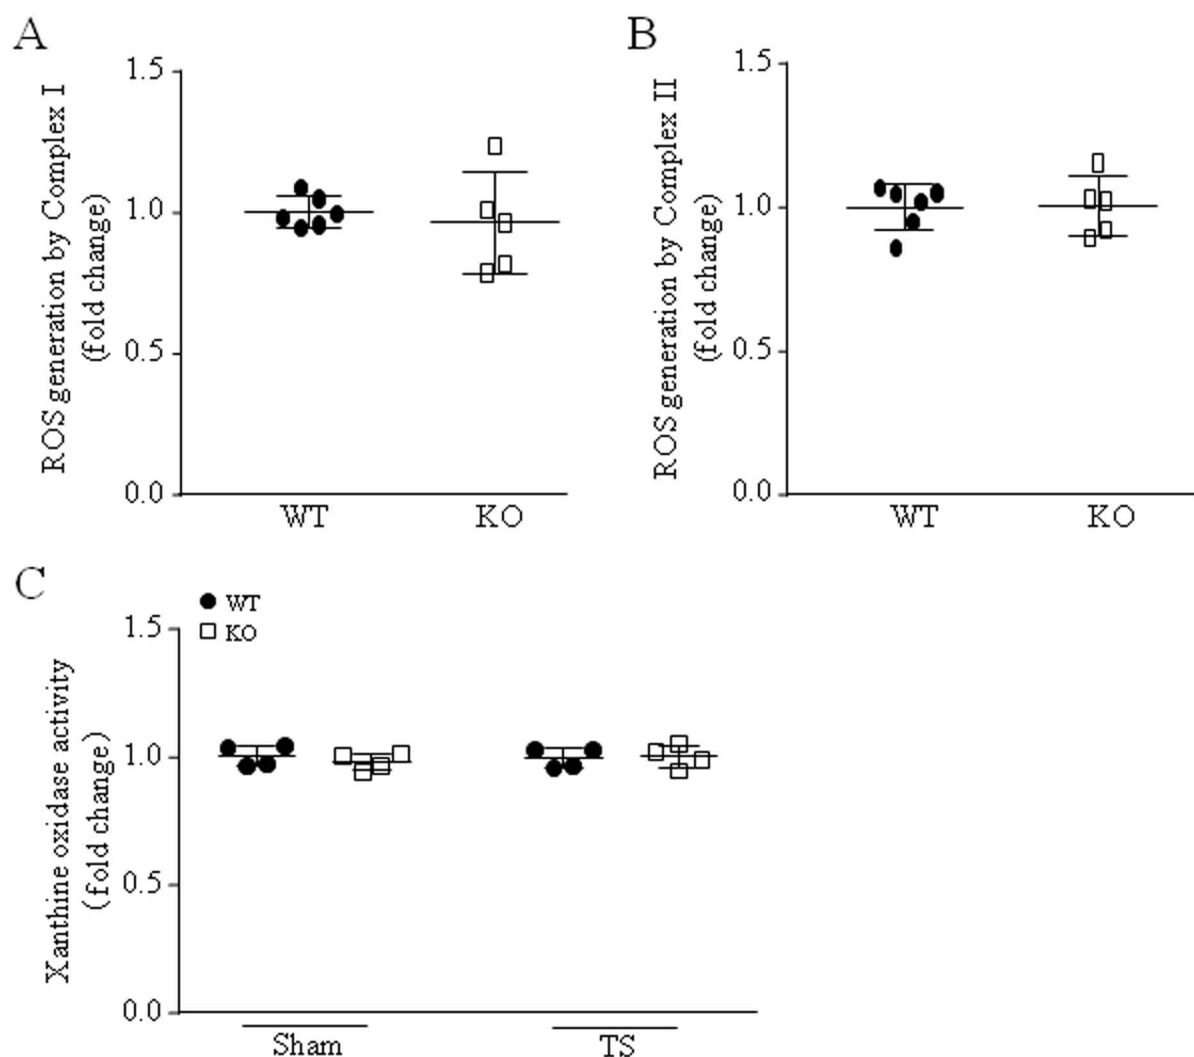

**Supplementary Figure 3. Determination of mitochondrial ROS generation in mitochondria and xanthine oxidase activity in heart tissues.** Mice with cardiomyocyte-specific deletion of *Capns1* (KO) and their wild-type littermates (WT) were subjected to tail-suspension (TS) for 28 days. (A and B) Mitochondrial ROS generation using complex I (A) and III substrates (B). Unpaired t test was performed for statistical analysis. (C) Xanthine oxidase activity. Data are mean  $\pm$  SD, n = 4-6 in each group. Two-way ANOVA followed by Newman-Keuls test was performed for statistical analysis. Interaction: F = 0.6026, P = 0.4526; Row Factor: F = 0.06058, P = 0.8097; Column Factor: F = 0.1294, P = 0.7253.

## Supplementary Figure 4

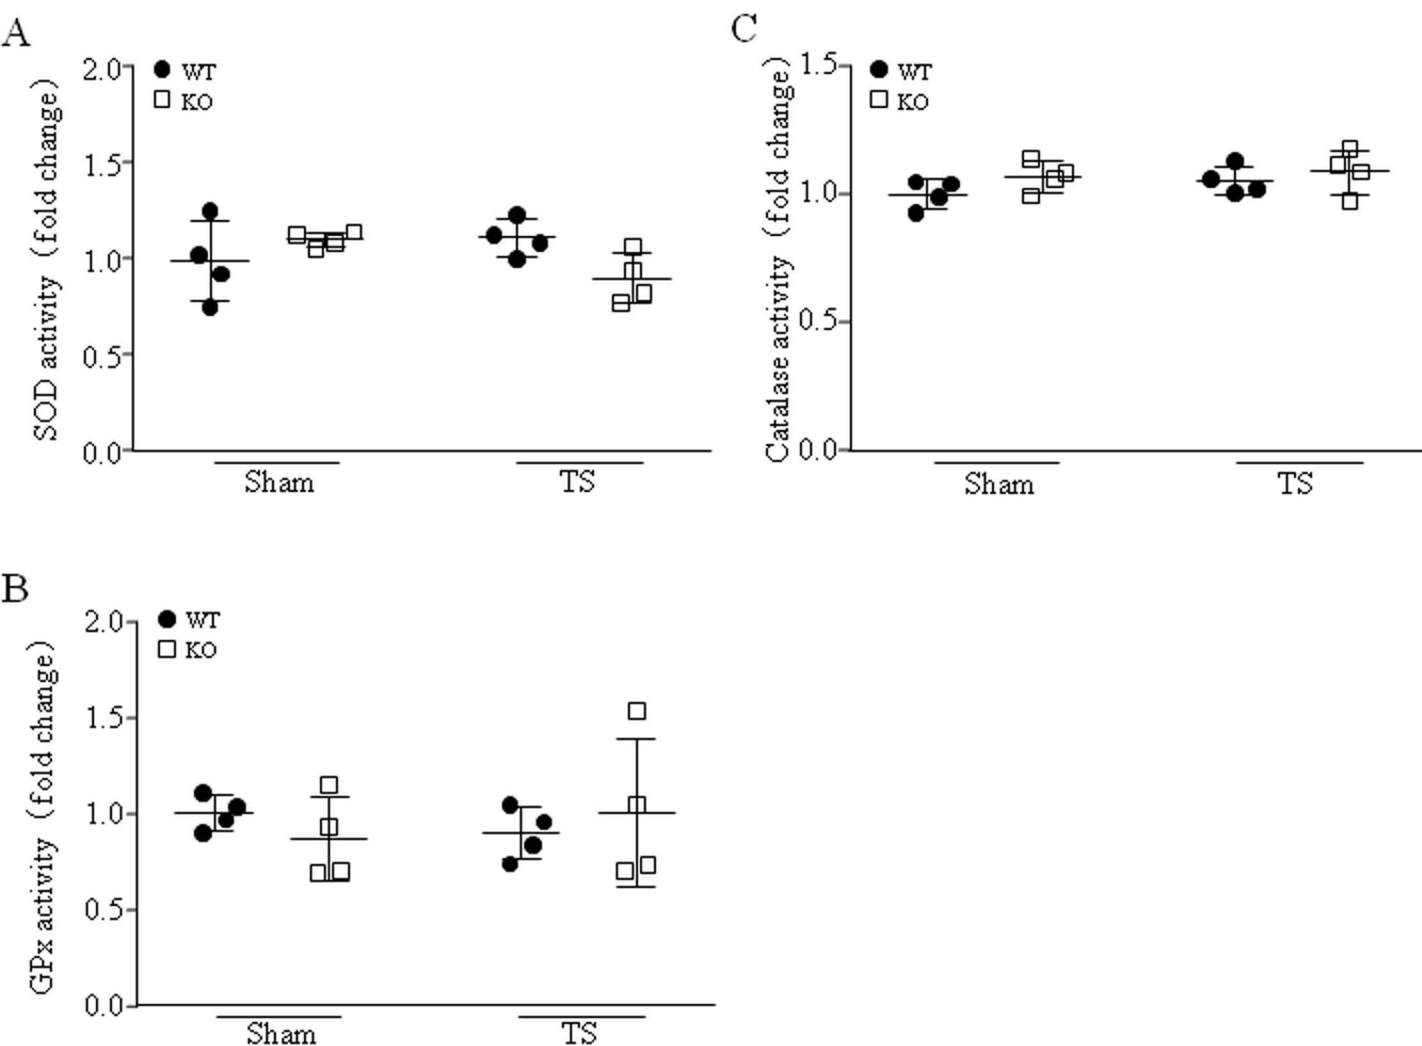

**Supplementary Figure 4. Deletion of *Capns1* does not affect tail-suspension-induced SOD activity, GPx activity and catalase activity in mouse hearts.** Mice with cardiomyocyte-specific deletion of *Capns1* (KO) and their wild-type littermates (WT) were subjected to tail-suspension (TS) for 28 days. (A) SOD activity, (B) GPx activity and (C) catalase activity were determined in mouse hearts. Data are mean  $\pm$  SD,  $n = 4$  in each group. Two-Way ANOVA was performed for statistical analysis. (A) Interaction:  $F = 5.84$ ,  $P = 0.0325$ ; Row Factor:  $F = 0.3372$ ,  $P = 0.5722$ ; Column:  $F = 0.5337$ ,  $P = 0.4791$ . (B) Interaction:  $F = 1.062$ ,  $P = 0.3230$ ; Row Factor:  $F = 0.01619$ ,  $P = 0.9009$ ; Column:  $F = 0.0117$ ,  $P = 0.9157$ . (C) Interaction:  $F = 0.2693$ ,  $P = 0.6132$ ; Row Factor:  $F = 1.232$ ,  $P = 0.2888$ ; Column:  $F = 2.307$ ,  $P = 0.1547$ .

## Supplementary Figure 5

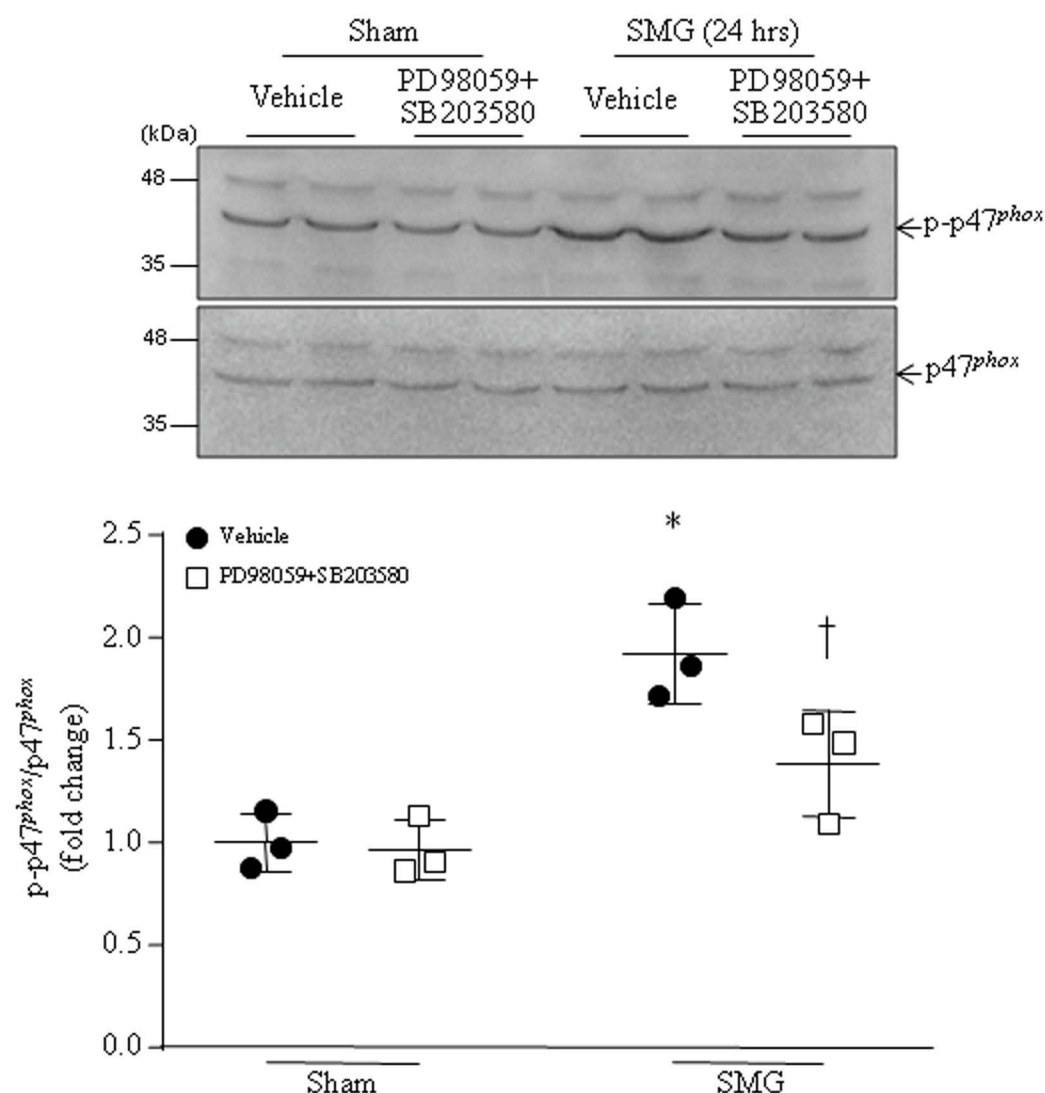

**Supplementary Figure 5. Effect of PD98059 plus SB203580 on p47<sup>phox</sup> phosphorylation.** Neonatal mouse cardiomyocytes were subjected to simulated microgravity (SMG) in the presence of PD98059 plus SB203580 (10  $\mu$ M for each) or vehicle for 24 hrs. Upper panel: A representative western from 3 different cell cultures with each in duplications for phosphorylated p47<sup>phox</sup> (p-p47<sup>phox</sup>) and total p47<sup>phox</sup>; Lower panel: Quantitation of p-p47<sup>phox</sup> / total p47<sup>phox</sup> ratio. Data are mean  $\pm$  SD, n = 3 different cultures. Two-way ANOVA followed by Newman-Keuls test was performed for statistical analysis. Interaction: F = 4.54, P = 0.0657; Row Factor: F = 32.5, P = 0.0005; Column: F = 5.951, P = 0.0406. \*P < 0.05 vs. Sham + vehicle and † P < 0.05 vs. SMG + vehicle.

## Supplementary Figure 6

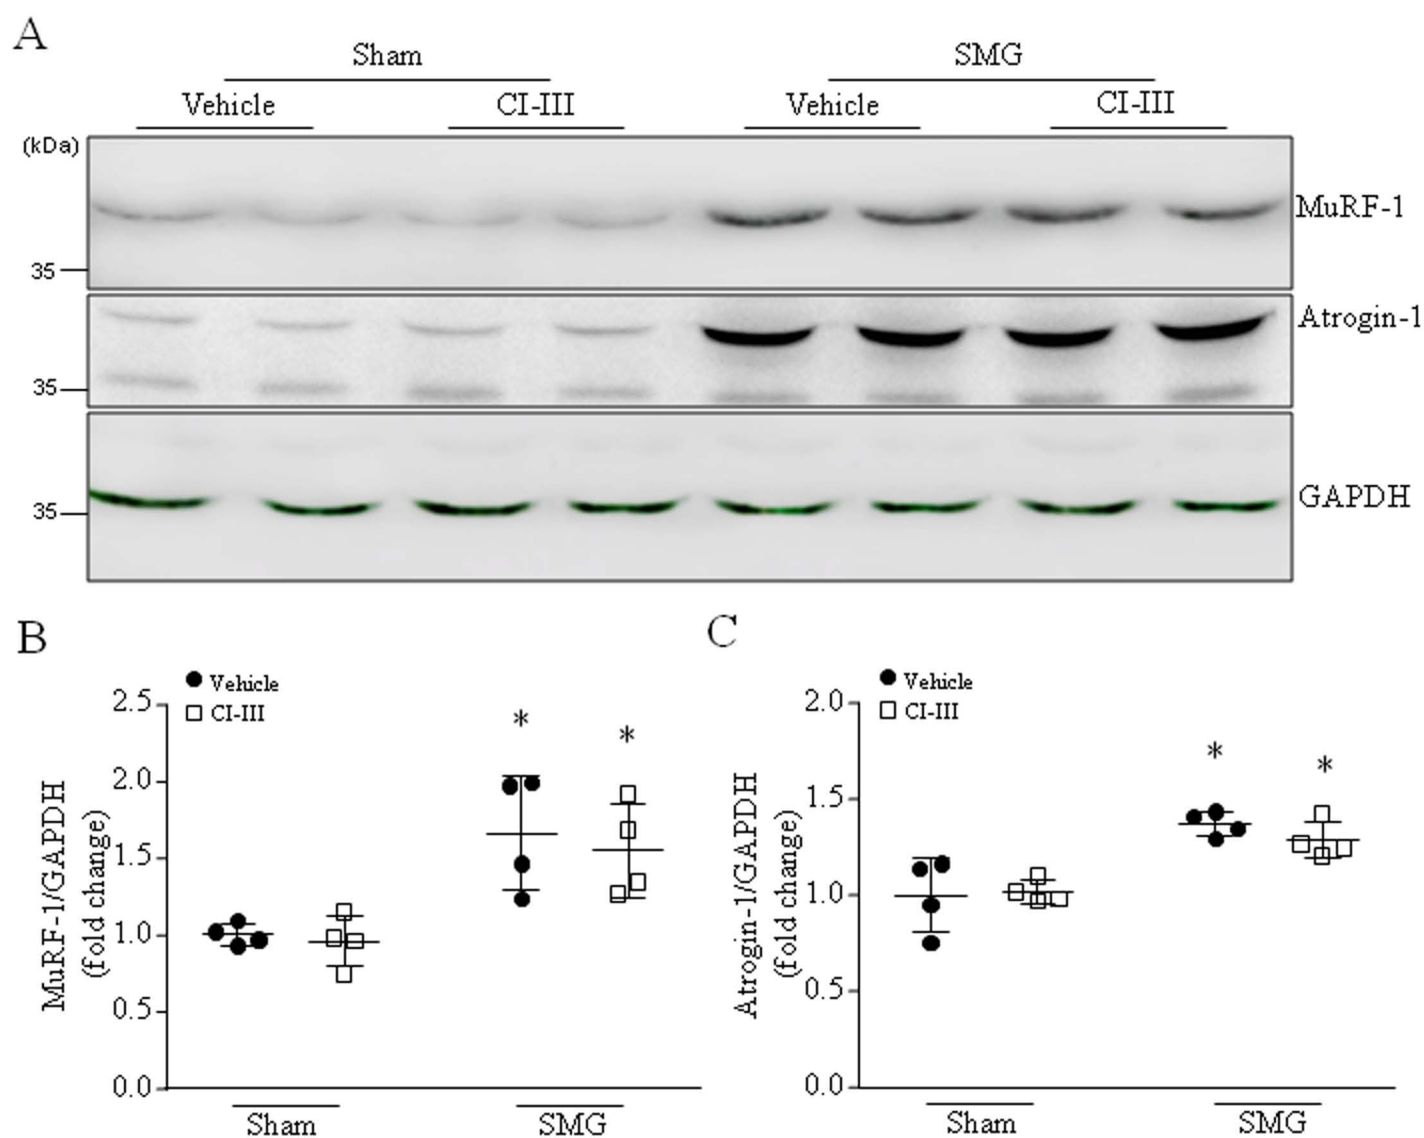

**Supplementary Figure 6. MuRF-1 and atrogin-1 expression in cultured cardiomyocytes in response to simulated microgravity.** Neonatal mouse cardiomyocytes were subjected to simulated microgravity (SMG) in the presence of calpain inhibitor-III (CI-III) or vehicle for 24 hrs. (A) A representative western from 3 different cell cultures with each in duplications for MuRF-1 and atrogin-1. (B) Quantitation of MuRF-1 protein levels relative to GAPDH. Data are mean  $\pm$  SD, n = 4 different cultures. Two-way ANOVA followed by Newman-Keuls test was performed for statistical analysis. Interaction: F = 0.07388, P = 0.7904; Row Factor: F = 23.7, P = 0.0004; Column: F = 0.3444, P = 0.5682. \*P < 0.05 vs. Sham + vehicle or Sham + CI-III. (C) Quantitation of atrogin-1 protein levels relative to GAPDH. Data are mean  $\pm$  SD, n = 4 different cultures. Two-way ANOVA followed by Newman-Keuls test was performed for statistical analysis. Interaction: F = 0.782, P = 0.3939; Row Factor: F = 30.48, P = 0.0001; Column: F = 0.3388, P = 0.5713. \*P < 0.05 vs. Sham + vehicle or Sham + CI-III.

## Supplementary Figure 7

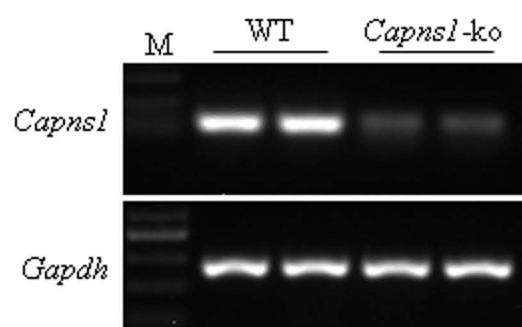

**Supplementary Figure 7. *Capns1* mRNA expression in hearts of *Capns1*-ko mice and their wild-type littermates (WT).** The mRNA expression of *Capns1* was determined in heart tissues of adult *Capns1*-ko mice and their wild-type littermates by RT-PCR. The representative agarose gel for *Capns1* and *Gapdh* mRNA from 2 different hearts in each group shows that the mRNA levels of *Capns1* are much lower in *Capns1*-ko compared with wild-type mouse hearts. M: DNA marker.

## Supplementary Tables

**Supplementary Table 1. Body weight, heart weight and hindlimb weight**

| Group | N | BW(g)         | HW(mg)         | HLW(mg)         | TL (mm)      | HW/TL (mg/mm) | HLW/TL (mg/mm) |
|-------|---|---------------|----------------|-----------------|--------------|---------------|----------------|
| WT    | 5 | 28.25 ± 1.23  | 115.84 ± 10.39 | 774.25 ± 33.68  | 18.52 ± 0.53 | 6.27 ± 0.67   | 41.84 ± 2.32   |
| KO    | 5 | 27.99 ± 0.61  | 109.36 ± 7.66  | 806.37 ± 36.03  | 18.15 ± 0.33 | 6.03 ± 0.46   | 44.44 ± 1.85   |
| TS-WT | 7 | 23.98 ± 1.47* | 86.29 ± 3.21*  | 487.51 ± 66.80* | 18.28 ± 0.82 | 4.72 ± 0.15*  | 26.72 ± 3.86*  |
| TS-KO | 7 | 24.60 ± 0.92  | 100.61 ± 9.78† | 497.54 ± 32.92  | 18.08 ± 0.46 | 5.57 ± 0.61†  | 27.53 ± 1.87   |

WT, wild type; KO, *Cyp11b* knockout; TS, tail suspension; N, number; BW, bodyweight; HW, heartweight; HLW, hindlimb weight; TL, tibia length. Data are mean ± SD. \*  $P < 0.05$  vs. WT; †  $P < 0.05$  vs. TS-WT.

**Supplementary Table 2. Echocardiographic analysis**

| Group | N | HR (bpm)       | LVID <sub>d</sub> (mm) | LVID <sub>s</sub> (mm) | E/A          | EF%            | FS%           |
|-------|---|----------------|------------------------|------------------------|--------------|----------------|---------------|
| WT    | 7 | 409.86 ± 7.97  | 3.60 ± 0.11            | 2.03 ± 0.19            | 2.08 ± 0.27  | 75.63 ± 5.02   | 52.92 ± 6.13  |
| KO    | 7 | 441.14 ± 12.26 | 3.70 ± 0.42            | 2.17 ± 0.51            | 1.87 ± 0.13  | 72.60 ± 9.69   | 49.58 ± 4.22  |
| TS-WT | 7 | 406.86 ± 25.56 | 3.88 ± 0.39            | 2.25 ± 0.67            | 1.26 ± 0.17* | 53.63 ± 10.04* | 27.32 ± 6.06* |
| TS-KO | 7 | 400.71 ± 23.05 | 3.33 ± 0.33            | 2.04 ± 0.52            | 1.48 ± 0.19† | 68.58 ± 15.46† | 44.44 ± 6.46† |

WT, wild type; KO, *Cyp11b* knockout; TS, tail suspension; N, number; HR, heart rate; LVID<sub>d</sub>, left ventricle end diastolic inner diameter; LVID<sub>s</sub>, left ventricle systolic inner diameter; E/A, the ratio of E over A; EF, ejection fraction; FS, fractional shortening. Data are mean ± SD. \*  $P < 0.05$  vs. WT; †  $P < 0.05$  vs. TS-WT.
